# Supplementary material for: Reporting inconsistency between published conference abstracts and article abstracts of randomised controlled trials in prosthodontics presented at IADR general sessions
Source: PeerJ. 2023 May 5;11:e15303. doi: 10.7717/peerj.15303 (PMC10166077; doi:10.7717/peerj.15303)
Supplement: Supplemental Information 5 [file peerj-11-15303-s005.xlsx]

## Sheet: Sheet1
			1.Title	2.Trial design	3.Participant	3a.criteria	3b.Settings	4.Interventions	5.Objective	6.Outcome1	7.Randomization	7a. Random	7b. Sequence	7c. Concealment	8.Blinding	8a.Only described single-blind or double-blind	9.Numbers Randomized	9a. only definite the total sample size	10.Recruitment	11.Numbers analyzed	11a.ITT	12.Outcome2	12a.Primary outcome	12b.Effect size	12c.Precision	13.Harms	14.Conclusions	15.Trial registration	16.Funding	SUM
Conference
1	1	Comparing The Time to Fabricate Complete Dentures Using Two Different Methods 2002	0	1	0	1	0	1	1	0	0	1	0	0	1	0	1	0	0	0	0	0	1	1	0	0	1	0	0	6
2	3	Does It Take More Time to Provide Mandibular 2-implant Overdentures Than Conventional Dentures? 2002	0	0	0	1	0	1	1	0	0	1	0	0	0	0	1	0	0	0	0	0	1	1	0	0	1	0	0	4
3	5	Effect of Occlusal Appliance Therapy on TMD Treatment Need in a Non-Patient Sample 2002	0	0	0	1	0	1	1	0	0	1	0	0	0	1	1	0	0	1	0	0	1	1	0	0	1	0	0	5
4	7	Giomer Composite and Microfilled Composite in Clinical Double Blind Study 2002	0	0	0	0	0	1	1	0	0	1	0	0	0	0	0	1	0	0	0	0	1	1	0	0	1	0	0	3
5	9	Mandibular Ridge Height and Perceptions of Conventional and Overdentures 2002	0	0	0	1	0	1	1	0	0	1	0	0	0	0	1	0	0	0	0	0	1	1	0	0	1	0	1	5
6	11	Photocolorimetric Measurements for Clinical Shade Matching of Porcelain Crowns 2002	0	0	0	1	0	1	1	0	0	1	0	0	0	0	0	1	0	0	0	0	1	1	0	0	1	0	0	3
7	13	Pulsed Radio Frequency Energy in Treatment of Temporomandibular Joint Pain 2002	0	0	0	1	0	1	1	0	0	1	0	0	0	1	1	0	0	0	0	0	1	1	0	1	1	0	1	6
8	15	Real-Time Assessment of Coping Processes in TMD Treatment 2002	0	0	0	1	0	1	1	0	0	1	0	0	0	0	1	0	0	0	0	0	1	1	0	0	1	0	0	4
9	17	Success of Hydroxyapatite vs. Titanium Implants: 5 year results 2002	0	1	0	1	0	1	1	0	0	1	0	0	0	0	0	0	0	0	0	0	1	1	0	0	1	0	0	4
10	19	The Effects of a Denture Adhesive on Masticatory Function 2002	0	0	0	1	0	1	1	0	0	1	0	0	0	0	1	0	0	0	0	0	1	0	0	0	1	0	0	4
11	21	Use of muscle exercise device in treatment of TMD 2002	0	0	1	1	1	1	1	0	0	1	0	0	0	0	0	1	0	0	0	0	1	1	0	0	1	0	0	4
12	23	Association between Sleep Bruxism and Gastroesophageal Reflux 2003	0	0	0	1	0	1	1	0	0	1	0	0	0	1	1	0	0	0	0	0	1	0	0	0	1	0	0	4
13	25	Clinical Evaluation of CAD/CAM-generated Composite Inlays: Three-year Report 2003	0	0	0	1	0	1	1	0	0	1	0	0	0	0	1	0	0	0	0	0	1	0	0	0	1	0	1	5
14	27	Cost-effectiveness of Mandibular Conventional and Two-implant Overdentures 2003	0	0	0	1	0	1	1	0	0	1	0	0	0	0	0	1	0	0	0	0	1	1	0	0	1	0	1	4
15	29	Effect of Wearing Complete Dentures on Body Equilibrium as the Dynamic Body Balance 2003	0	0	1	1	1	1	1	0	0	1	0	0	0	0	1	0	0	0	0	0	1	1	0	0	1	0	0	5
16	31	Is a Stabilization Appliance Effective in the Treatment of Tension-type Headache in Patients with TMD of Myogenous Origin? 2003	0	1	1	1	1	1	1	0	0	1	0	0	0	0	0	1	0	0	0	0	1	0	0	0	1	0	0	5
17	33	Selected Characteristics of a New Polyvinylsiloxane Impression Material: A Randomized Clinical Trial 2003	1	0	1	1	1	1	1	0	0	1	0	0	0	0	0	1	0	0	0	1	1	1	1	0	1	0	1	7
18	35	Sensitivity of the Human Jaw-stretch Reflex: Effects of TMJ Anesthesia and of Jaw Gape 2003	0	0	0	1	0	1	1	0	0	1	0	0	0	1	0	1	0	0	0	0	1	0	0	0	1	0	1	4
19	37	Speech Errors with Maxillary Fixed and Removable Implant Prostheses 2003	0	1	0	1	0	1	1	0	0	0	0	0	0	0	1	0	0	0	0	0	1	1	0	0	1	0	1	6
20	39	Two-year Clinical Effectiveness of a Self-etch Adhesive in Cervical Lesions 2003	0	1	0	1	0	1	1	0	0	1	0	0	0	1	0	1	0	0	0	0	1	0	0	1	1	0	0	5
21	41	Five-year Clinical Evaluation of Two Adhesives in Non-carious Cervical Lesions 2004	0	0	0	1	0	1	1	0	0	1	0	0	1	0	1	0	0	1	0	0	1	0	0	1	1	0	1	8
22	43	Intramuscular Injection of Granisetron in TMD Patients and Healthy Subjects 2004	0	0	0	1	0	1	1	0	0	1	0	0	0	1	0	1	0	0	0	0	1	0	0	0	1	0	0	3
23	45	Peri-implant outcome of 2-implant mandibular overdentures: a 10-year randomized study 2004	1	0	0	1	0	1	1	0	0	1	0	0	0	0	0	1	0	1	0	0	1	1	0	0	1	0	0	5
24	47	Postoperative Sensitivity: Comparison of Two Dentin Bonding Agents 2004	0	0	0	1	0	1	1	0	0	1	0	0	0	1	0	1	0	0	0	0	1	1	0	0	1	0	1	4
25	49	Aftercare and Cost-Analysis with 3-types of Mandibular Implant-retained Overdentures 2005	0	0	0	1	0	1	1	0	0	0	0	0	0	0	0	1	0	1	0	0	1	0	0	0	1	0	0	4
26	51	Candida Albicans Recolonization in Denture Stomatitis Patients After LLLT Treatment 2005	0	1	0	1	0	1	1	0	0	1	0	0	0	1	0	1	0	0	0	0	1	1	0	0	1	0	0	4
27	53	Clinical Success Rates for Polyvinylsiloxane and Polyether Dual-Viscosity Impressions 2005	0	0	0	1	0	1	1	1	0	1	0	0	0	0	1	0	0	1	0	1	1	1	1	0	1	0	1	8
28	55	Do simplified complete denture fabrication techniques produce more unscheduled consultations? 2005	0	0	0	1	0	1	1	0	0	1	0	0	0	0	1	0	0	0	0	1	1	1	1	0	1	0	0	5
29	57	Does occupational therapy improve manual performance in tooth/denture brushing? 2005	0	0	1	1	1	1	1	0	0	1	0	0	0	0	0	1	0	0	0	0	1	0	0	0	1	0	0	4
30	59	Five Year Survival following Restoration of Shortened Lower Dental Arches 2005	0	0	0	1	0	1	1	0	0	1	0	0	0	0	1	0	0	1	0	1	1	1	1	0	1	1	0	7
31	61	Hybrid Bond and XenoIII in cervical lesions: 6 month results 2005	0	1	0	1	0	1	1	0	0	1	0	0	0	0	0	1	0	1	0	0	1	0	0	1	1	0	1	7
32	63	Outcomes from a Randomised Controlled Trial of Implant Overdentures 2005	1	0	1	1	1	1	1	0	0	1	0	0	0	0	1	0	0	1	1	0	1	0	0	0	1	0	0	7
33	65	Simple versus advanced fabrication of complete dentures: Chewing ability 2005	0	1	0	1	0	1	1	0	0	1	0	0	0	0	1	0	0	0	0	0	1	0	0	0	1	0	1	6
34	67	Simple versus advanced fabrication of complete dentures: patient satisfaction 2005	0	1	0	1	0	1	1	0	0	1	0	0	0	0	1	0	0	0	0	0	1	0	0	0	1	0	1	6
35	69	Sleep Bruxism Reduction by Double Arch Device and Occlusal Splint 2005	0	1	0	1	0	1	1	0	0	0	0	0	0	0	0	1	0	0	0	0	1	0	0	0	1	0	1	5
36	71	TMD Pain Reduction in Splint Therapy Associated with Reduced Parafunctions 2005	0	0	0	1	0	1	1	0	0	1	0	0	0	1	1	0	0	0	0	0	1	0	0	0	1	1	0	5
37	73	A Randomised Trial of Food Choices Made By Edentulous Adults 2006	1	0	1	1	1	1	1	0	0	1	0	0	0	0	1	0	0	1	1	0	1	0	0	0	1	0	0	7
38	75	A Randomized Clinical Trial on Cusp-Replacing Composite Restorations: One-Year Results 2006	1	0	0	1	0	1	1	0	0	1	0	0	0	0	1	0	0	0	0	0	1	0	0	0	1	0	0	5
39	77	Clinical outcomes and esthetic results of non-submerged immediate implants 2006	0	0	0	1	0	1	1	0	0	1	0	0	0	0	0	1	0	0	0	0	1	1	0	0	1	0	0	3
40	79	Clinical Evaluation of CAD/CAM-Generated Composite Inlays: Six-Year Report 2006	0	0	0	1	0	1	1	0	0	1	0	0	0	0	0	1	0	0	0	0	1	0	0	1	1	0	1	5
41	81	3-Year Clinical Evaluation of an All-In-One Self-Etching Dental Adhesive 2007	0	0	0	1	0	1	1	0	0	1	0	0	0	0	1	0	0	0	0	0	1	0	0	0	1	0	1	5
42	83	Clinical Outcomes of Immediately Loaded Implant-Supported Mandibular Fixed Prostheses 2007	0	1	1	1	1	1	1	0	0	1	0	0	1	0	0	1	0	0	0	0	1	0	0	0	1	0	1	7
43	85	Color match of crowns with zirconia and metal frameworks 2007	0	0	0	1	0	1	1	0	0	0	0	0	0	0	0	1	0	0	0	0	1	1	0	0	1	0	0	3
44	87	Detecting erosions in temporomandibular joint RA by a cone-beam CT 2007	0	0	0	1	0	1	1	0	0	1	0	0	0	0	0	1	0	0	0	0	1	0	0	0	1	1	0	4
45	89	Duplicating the number of adhesive coats: an 18-month clinical trial 2007	0	0	0	1	0	1	1	0	0	1	0	0	0	0	0	1	0	1	0	0	1	0	0	0	1	0	0	4
46	91	Effect of Physiotherapy on Bruxism and Head Posture 2007	0	0	0	1	0	1	1	0	0	1	0	0	0	1	1	0	0	0	0	0	1	0	0	0	1	0	0	4
47	93	Effectiveness of Low-Level Laser Therapy in Treatment of Temporomandibular 2007	0	0	0	0	0	1	1	0	0	1	0	0	0	0	0	1	0	0	0	0	1	0	0	0	1	0	0	3
48	95	Healing of immediate transmucosal implants in the esthetic zone 2007	0	0	0	0	0	1	1	0	0	1	0	0	0	0	0	1	0	0	0	0	1	0	0	0	1	0	1	4
49	97	Inferior Jonit Space Injection Therapy in Patients with TMD 2007	0	0	0	0	0	1	1	0	0	1	0	0	0	0	0	1	0	1	0	0	1	0	0	0	1	0	0	4
50	99	Randomized Clinical Study of Initial Treatment for Temporomandibular Disorder ADDWOR 2007	1	0	1	1	1	1	1	0	0	1	0	0	0	0	0	1	0	0	0	0	1	0	0	0	1	0	0	5
51	101	Clinical Comparison of Proximal Contacts Obtained with Different Matrix Systems 2008	0	0	0	1	0	1	1	0	0	1	0	0	0	0	1	0	0	0	0	0	1	1	0	0	1	0	0	4
52	103	Converting one-step into two-step self-etch system improves its clinical performance 2008	0	0	0	1	0	1	1	0	0	1	0	0	0	0	0	1	0	1	0	0	1	0	0	0	1	0	0	4
53	105	Cost-efficiency of Two Methods of Fabrication of Conventional Dentures 2008	0	0	0	0	0	1	1	0	0	1	0	0	0	0	0	0	0	0	0	0	1	0	0	0	1	0	0	3
54	107	Does mandibular condition affect prosthetic treatment success in edentulous elders? 2008	0	0	0	1	0	1	1	0	0	1	0	0	0	0	0	1	0	0	0	0	1	0	0	0	1	0	0	3
55	109	Effect of a Titrable Mandibular Advancement Appliance on Sleep Bruxism 2008	0	1	0	1	0	1	1	0	0	1	0	0	0	0	0	1	0	0	0	0	1	0	0	1	1	0	0	5
56	111	Effect of microwave disinfection in the treatment of denture stomatitis 2008	0	0	0	1	0	1	1	0	0	1	0	0	0	0	0	1	0	0	0	0	1	0	0	0	1	0	0	3
57	113	Glutamate-Induced Temporomandibular Joint Pain is Partially Mediated by NMDA Receptors 2008	0	0	0	0	0	1	1	0	0	1	0	0	0	1	0	1	0	0	0	0	1	1	0	0	1	1	0	4
58	115	RCT of a HEMA-free all-in-one adhesive in non-carious cervical lesions 2008	0	0	0	1	0	1	1	0	0	1	0	0	0	0	0	1	0	0	0	0	1	0	0	0	1	0	1	4
59	117	Relationships Between Facial Form and Alveolar Ridge Height 2008	0	0	0	1	0	1	1	0	0	1	0	0	0	0	1	0	0	0	0	0	1	0	0	0	1	0	0	4
60	119	Results with Overdentures Retained by One or Two Implants 2008	0	0	0	1	0	1	1	0	0	1	0	0	0	0	0	1	0	0	0	0	1	0	0	0	1	1	1	5
61	121	Self-Adhesive Composite Versus Zinc-Oxide-Phosphate Luting Cements: A Prospective Clinical Trial 2008	0	0	0	1	0	1	1	0	0	1	0	0	0	0	0	1	0	0	0	0	1	0	0	0	1	0	0	3
62	123	A Prospective, Randomized Study of Medialized vs Conventional Implant Abutments 2009	1	0	0	1	0	1	1	0	0	1	0	0	0	0	0	1	0	0	0	0	1	0	0	0	1	1	0	5
63	125	A Study of Denture Adhesive in Well-Fitting Dentures 2009	0	1	0	1	0	1	1	0	0	1	0	0	0	1	0	1	0	0	0	0	1	0	0	0	1	0	1	5
64	127	Clinical Evaluation of a Self-Etching Adhesive After Two Years 2009	0	0	0	1	0	1	1	0	0	1	0	0	0	0	0	1	0	1	0	0	1	0	0	1	1	0	1	6
65	129	Clinical performance of cervical restoration with potassium oxalate-based desensitizing 2009	0	0	0	1	0	1	1	0	0	1	0	0	0	0	0	1	0	1	0	0	1	0	0	0	1	0	0	4
66	131	Color stability of reline resin after microwave disinfection: clinical evaluation 2009	0	0	0	1	0	1	1	0	0	1	0	0	0	0	1	0	0	0	0	0	1	0	0	0	1	0	1	5
67	133	Evaluation of Packable and Conventional Hybrid Composite Resins in Restorations 2009	0	1	0	1	0	1	1	0	0	1	1	0	0	1	0	1	0	0	0	0	1	0	0	0	1	1	0	5
68	135	In vivo analysis of enamel wear against ceramic materials 2009	0	0	0	1	0	1	1	0	0	1	0	0	0	0	0	1	0	0	0	0	1	0	0	0	1	0	1	4
69	137	Management of Peri-implant Mucositis using Ozone and Hydrogen Peroxide 2009	0	0	0	1	0	1	1	0	0	1	0	0	0	1	0	1	0	0	0	0	1	0	0	1	1	0	0	4
70	139	Metallic and Translucent Matrices for Class-II Composite Restorations: 4-year Follow-up 2009	0	0	0	1	0	1	1	0	0	1	0	0	0	0	0	1	0	1	0	0	1	0	0	0	1	0	0	4
71	141	The German Shortened Dental Arch Study: Quality of Life 2009	0	0	0	1	0	1	1	0	0	1	0	0	0	0	1	0	0	1	0	0	1	0	0	0	1	0	1	6
72	143	Three-year Clinical Evaluation of Resin Composites in Non-carious Cervical Lesions 2009	0	0	0	1	0	1	1	0	0	1	0	0	1	0	1	0	0	1	0	0	1	0	0	0	1	0	0	6
73	145	2-Year Clinical Effectiveness of All-in-One Adhesives in Non-carious Cervical Lesions 2010	0	0	0	1	0	1	1	0	0	1	0	0	0	0	0	1	0	0	0	0	1	0	0	0	1	0	0	3
74	147	Comparison of Photodynamic Therapy and Antifungal Treatment for Denture Stomatitis 2010	0	0	0	1	0	1	1	0	0	1	0	0	0	0	1	0	0	0	0	0	1	0	0	0	1	0	1	5
75	149	Effect of Electromyogram-Biofeedback on Daytime Clenching Behavior in TMD Subjects 2010	0	0	0	1	0	1	1	0	0	1	0	0	0	0	0	1	0	0	0	0	1	0	0	0	1	0	0	3
76	151	Effectiveness of Prefabricated Occlusal Appliance in TMD Patients with Headache 2010	0	0	1	1	1	1	1	0	0	1	0	0	0	0	1	0	0	0	0	0	1	0	0	0	1	0	0	5
77	153	Efficacy of mouthwashes on Candida albicans with denture stomatitis patients 2010	0	0	0	1	0	1	1	0	0	1	0	0	0	0	0	1	0	0	0	0	1	0	0	0	1	0	0	3
78	155	Efficiency of Occlusal Splint Treatment in Temporomandibular Disorders 2010	0	0	1	1	1	1	1	0	0	1	0	0	0	0	1	0	0	0	0	0	1	1	0	0	1	0	1	6
79	157	Eight-Year Clinical Evaluation of a Two-Step Self-Etch Adhesive 2010	0	0	0	1	0	1	1	0	0	1	0	0	0	0	0	1	0	1	0	0	1	0	0	0	1	0	0	4
80	159	Five-year follow-up of implant-supported all-ceramic FDPs. A randomized clinical trial. 2010	1	0	0	1	0	1	1	0	0	0	0	0	0	0	1	0	0	1	0	0	1	0	0	0	1	0	0	6
81	161	Laser stimulation for acupuncture points as temporomandibular chronic symptoms treatment 2010	0	0	0	1	0	1	1	0	0	0	0	0	0	0	1		0	0	0	0	1	0	0	0	1	0	0	4
82	163	Lingualized occlusion has advantage for severe alveolar ridge resorption 2010	0	0	0	1	0	1	1	0	0	1	0	0	0	0	1		0	0	0	0	1	0	0	0	1	0	0	4
83	165	Long-Term Efficacy of Resilient Appliance Therapy in TMD Patients 2010	0	0	0	1	0	1	1	1	0	1	0	0	0	0	1		0	0	1	0	1	0	0	0	1	0	0	5
84	167	Mandibular 2-Implant Overdentures: The Stability and Magnitude of the Effect 2010	0	0	0	0	0	1	1	0	0	1	0	0	0	0	1		0	0	0	0	1	0	0	0	1	0	1	5
85	169	Nonsurgical Treatment of Peri-Implantitis: a Controlled Clinical Study 2010	0	1	0	1	0	1	1	0	0	1	0	0	0	0	0	1	0	0	0	0	1	0	0	0	1	0	0	4
86	171	Occlusal contacts are affected by experimental jaw muscle pain 2010	0	1	0	1	0	1	1	0	0	1	0	0	0	0	1	0	0	0	0	0	1	0	0	0	1	0	0	5
87	173	Stratified RCT Comparing Implant Stability of 3 Load Timing Groups 2010	1	0	0	1	0	1	1	0	0	1	0	0	0	0	1	0	0	1	0	0	1	1	0	0	1	0	0	6
88	175	The randomized shortened dental arch study: 5-year complication rates 2010	1	0	0	1	0	1	1	0	0	1	0	0	0	0	1	0	0	1	0	0	1	0	0	0	1	0	1	7
89	177	24-month clinical evaluation of class-V restorations with two different composites 2011	0	0	1	1	1	1	1	0	0	1	0	0	0	0	0	1	0	0	0	0	1	0	0	1	1	0	0	5
90	179	Botulinum toxin type-A for treatment of persistent myofascial TMD pain 2011	0	1	0	0	0	1	1	1	0	1	0	0	0	0	0	1	0	0	0	0	1	0	0	0	1	0	1	6
91	181	Clinical efficacy of a castor bean solution as denture cleanser 2011	0	1	0	0	1	1	1	1	1	1	1	1	0	0	1	0	0	0	0	0	1	0	0	0	1	0	0	7
92	183	Clinical Evaluation of a New Simplified Adhesive in Cervical Lesions 2011	0	0	0	0	1	1	1	0	0	1	0	0	0	0	1	0	0	1	0	0	1	0	0	0	1	0	0	5
93	185	Clinical Evaluation of CAD/CAM-Generated Composite Inlays: Ten-Year Report 2011	0	0	0	0	0	1	1	0	0	1	0	0	0	0	1	0	0	0	0	0	1	0	0	0	1	0	0	4
94	187	Clinical trial of cervical composite restorations with or without bevel 2011	0	0	0	0	0	1	1	0	0	1	0	0	0	1	1	0	0	0	0	0	1	0	0	0	1	0	0	4
95	189	Color Change Of Relined Dentures After Disinfection: A Clinical Trial 2011	0	0	0	1	0	1	1	0	0	1	0	0	0	0	1	0	0	0	0	0	1	0	0	0	1	0	1	5
96	191	Conversion of Easy-Bond into a two-step self-etch adhesive: 18-months results 2011	0	0	0	1	0	1	1	0	0	1	0	0	0	0	1	0	0	1	0	0	1	0	0	0	1	0	0	5
97	193	Cost Effectiveness of Tooth Replacement Strategies for Partially Dentate Elders 2011	0	0	1	1	1	1	1	0	0	1	0	0	0	0	0	1	0	0	0	0	1	0	0	0	1	0	0	4
98	195	Denture microwave disinfection in treating diabetics with denture stomatitis 2011	0	0	0	1	0	1	1	0	0	1	0	0	0	0	1	0	0	0	0	0	1	0	0	0	1	0	1	5
99	197	Early Loading Maxillary Cresco Full Arch Reconstructions. An RCT trial 2011	1	0	1	1	1	1	1	0	0	1	0	0	0	1	0	1	0	1	0	0	1	0	0	0	1	0	1	7
100	199	No Influence of Platform-Switching on Crestal Bone Level Alterations 2011	0	1	0	1	0	1	1	0	0	0	0	0	0	0	1	0	0	0	0	1	1	1	1	0	1	0	0	6
101	201	24-Month Clinical Performance of a Glass-Ionomer Restorative System 2012	0	0	0	1	0	1	1	0	0	1	0	0	0	0	1	0	0	1	0	0	1	1	0	0	1	0	0	5
102	203	A New Universal Simplified Adhesive: 6-Month Clinical Evaluation 2012	0	0	0	1	0	1	1	0	0	1	0	0	0	0	0	1	0	1	0	0	1	0	0	0	1	0	0	4
103	205	Alkaline Peroxides Versus Sodium Hypochlorite as Overnight Denture Cleansers 2012	0	1	0	1	0	1	1	0	0	1	0	0	0	0	1	0	0	0	0	1	1	1	1	0	1	0	0	6
104	207	Analgesia of Low Power Laser in TMJ Arthralgia 2012	0	0	0	1	0	1	1	0	0	1	0	0	0	0	1	0	0	0	0	0	1	0	0	0	1	0	0	4
105	209	Are TT And TTB Effective In Color Matching? 2012	0	0	1	1	1	1	1	0	0	1	0	0	0	1	1	0	0	0	0	0	1	0	0	0	1	0	0	5
106	211	Biofilm Formation After Clinical Disinfection of Relined Dentures 2012	0	0	0	1	0	1	1	0	0	1	0	0	0	0	1	0	0	0	0	0	1	0	0	0	1	0	1	5
107	213	Clinical evaluation: EDTA in the adhesion with self-etch adhesive system 2012	0	0	0	1	0	1	1	0	0	1	0	0	0	0	1	0	0	1	0	0	1	1	0	0	1	0	0	5
108	215	Clinical Performance of Silorane-Based Composite Resin in Class II Restorations 2012	0	0	0	0	0	1	1	0	0	1	0	0	0	1	1	0	0	1	0	0	0	1	0	0	1	0	0	5
109	217	Does inter-implant angulation affect attachment retention in two-implant overdentures? 2012	0	1	0	1	0	1	1	0	0	1	0	0	0	0	1	0	0	0	0	0	1	1	0	0	1	0	0	5
110	219	Early or Delayed Single Implants in Extraction Sockets: 10-year Results 2012	0	0	0	1	0	1	1	0	0	1	0	0	1	0	1	0	0	0	0	0	1	0	0	0	1	0	0	5
111	221	Effect of Systemic Antibiotics on Implant Therapy- a Clinical Trial 2012	0	0	0	1	0	1	1	0	0	1	0	0	1	0	1	0	0	0	0	0	1	1	0	0	1	0	0	5
112	223	Equivalent bone-level-alterations at implants with platform-switching and implants with matching-platforms 2012	0	1	0	1	0	1	1	0	0	1	0	0	0	0	1	0	0	0	0	0	1	1	0	0	1	0	0	5
113	225	Implant Overdentures and Dietary Intake: A Randomized Clinical Trial 2012	1	0	0	1	0	1	1	0	0	1	0	0	0	0	1	0	0	0	0	1	1	1	1	0	1	0	1	7
114	227	Masticatory Efficiency of Complete Denture Wearers with Reduced Dental Arch 2012	0	0	0	0	0	1	1	0	0	1	0	0	0	0	1		0	0	0	0	1	0	0	0	1	0	0	4
115	229	Prophylaxis Vs Antimicrobial Therapy in Patients Undergoing Oral Implants 2012	0	0	0	1	0	1	1	0	0	1	0	0	0	0	1	0	0	0	0	0	1	1	0	0	1	0	0	4
116	231	Repositioning occlusal splints and NTI-tss in Temporomandibular Joint arthralgia 2012	0	0	0	1	0	1	1	0	0	1	0	0	0	0	0	1	0	0	0	0	1	1	0	0	1	0	0	3
117	233	Simplified Versus Conventional Method for Complete Denture Fabrication: Cost Analysis. 2012	0	0	0	1	0	1	1	0	0	1	0	0	0	0	1	0	0	0	0	0	1	1	0	0	1	0	0	4
118	235	The Effect of Overnight Storage on Removable Denture Biofilm 2012	0	0	0	1	0	1	1	0	0	1	0	0	0	0	1		0	0	0	0	1	1	0	0	1	0	0	4
119	237	18-month Clinical Evaluation of New Etch-and-Rinse Adhesive in Cervical Lesions 2013	0	0	0	1	0	1	1	0	0	1	0	0	0	0	0	1	0	1	0	1	1	1	1	0	1	0	0	5
120	239	6-Months Clinical Comparison of Two Resin Composites on Diastema Closure 2013	0	0	0	1	0	1	1	0	0	1	0	0	0	0	1	0	0	1	0	0	1	1	0	0	1	0	0	5
121	241	Anti-infective therapy of periimplantitis:Outcomes of a 12-month RCT 2013	1	0	0	1	0	1	1	1	0	1	0	0	0	0	1	0	0	0	0	0	1	1	0	0	1	0	0	6
122	243	Bacterial Adhesion on Titanium and Zirconia: DNA Checkerboard Clinical Trial 2013	0	1	0	0	0	1	1	0	0	1	0	0	0	0	1	1	0	0	0	0	1	1	0	0	1	0	0	5
123	245	Cross-over clinical trial of biofilm formation influenced by adhesive usage 2013	0	1	0	1	0	1	1	0	0	1	0	0	0	0	1	0	0	0	0	0	0	1	0	0	1	0	0	5
124	247	Denture Adhesive Influence on Masticatory Function of Complete Denture Wearers 2013	0	1	0	1	0	1	1	0	0	1	1	0	0	0	0	1	0	0	0	0	0	1	0	0	1	0	0	4
125	249	Effect of adhesive usage on satisfaction of complete denture wearers 2013	0	1	0	0	0	1	1	0	0	1	1	0	0	0	1	0	0	0	0	0	1	1	0	0	1	0	0	5
126	251	Randomized Shortened Dental Arch Study: Periodontal Health Over Five Years 2013	1	0	0	1	0	1	1	0	0	1	0	0	0	0	0	1	0	1	0	0	1	0	0	0	1	0	1	6
127	253	Simplified versus conventional method for complete denture fabrication 2013	0	0	0	1	0	1	1	0	0	1	0	0	0	0	1	0	0	1	0	0	1	1	0	0	1	0	0	5
128	255	60-Month Clinical Performance Of A Glass-Ionomer Restorative System 2014	0	0	0	0	0	1	1	0	0	1	0	0	0	0	0	1	0	1	0	0	1	1	0	0	1	0	0	4
129	257	Antimicrobial Action and Denture Stomatitis Remission: Effect of Denture Cleansers 2014	0	1	0	0	0	1	1	0	0	1	0	0	0	0	0	1	0	0	0	0	1	1	0	0	1	0	0	4
130	259	Clinical Implications from a RCT of Complete Denture Impression Materials 2014	1	1	1	1	1	1	1	1	0	1	0	0	0	1	1	0	0	1	0	1	1	1	1	0	1	0	0	10
131	261	Efficacy of Stabilization Splint Treatment on Facial Pain-One-year Follow-up 2014	0	0	0	1	0	1	1	0	0	1	0	0	0	0	1	0	0	0	0	0	1	0	0	0	1	0	0	4
132	263	Implant Maintenance with a Chitosan Brush –A Randomized Clinical Trial 2014	1	1	0	1	0	1	1	0	0	1	0	0	1	0	1	0	0	0	0	0	1	0	0	1	1	0	0	8
133	265	R.communis and sodium hypochlorite's clinical evaluation for denture cleansing 2014	0	0	0	1	0	1	1	0	0	1	1	0	0	0	0	1	0	0	0	0	1	1	0	0	1	0	0	3
134	267	3-year Randomized Controlled Prospective Clinical Trial on Different CAD-CAM Implant Abutments 2015	1	0	0	0	0	1	1	0	0	1	0	0	0	0	1	0	0	0	0	0	1	1	0	0	1	1	0	6
135	269	A Fractographic Study of Clinically Retrieved Zirconia-Ceramic and Metal-Ceramic FPDs 2015	0	0	0	1	0	1	1	0	0	1	0	0	0	0	1	0	0	0	0	0	1	0	0	0	1	0	0	4
136	271	Abutment Color and Gingival Thickness Influence on Soft Tissue Color 2015	0	0	0	0	0	1	1	0	0	1	0	0	0	0	0	1	0	1	0	0	0	1	0	0	1	0	0	4
137	273	Clinical Comparison of a Flowable to Conventional Resin Composite 2015	0	0	0	0	0	1	1	0	0	1	0	0	0	1	1	0	0	1	0	0	1	1	0	0	1	0	1	6
138	275	Complications of Zirconia Single Crowns: a 3-year Randomised Prospective Clinical Trial 2015	1	0	0	1	0	1	1	0	0	1	0	0	0	0	1	0	0	0	0	0	1	1	0	0	1	1	0	6
139	277	Crown vs. Composite for Post-retained Restorations: up to 59-month Trial 2015	0	0	0	1	0	1	1	0	0	1	0	0	0	0	0	1	0	1	0	0	1	1	0	0	1	1	0	5
140	279	Effect of Different Prosthetic Abutments on Peri-Implant Soft Tissue: A Randomized Clinical Trial 2015	1	0	0	0	0	1	1	0	0	1	0	0	0	0	1	0	0	0	0	0	1	0	0	0	1	0	0	5
141	281	Flap vs. Flapless Immediate Implant Placement- A Randomized Controlled Trial 2015	1	0	0	1	0	1	1	0	0	1	0	0	0	0	0	1	0	0	0	0	1	1	0	0	1	0	0	4
142	283	High-Definition Non-Invasive Brain Modulation of Sensorimotor Dysfunction in Chronic TMD 2015	0	1	0	1	0	1	1	0	0	1	0	0	0	1	0	1	0	0	0	0	0	1	0	0	1	0	0	4
143	285	Mandibular Overdentures Retained by One or Two Implants: Kinesiographic Study 2015	0	0	0	1	0	1	1	0	0	1	0	0	0	0	0	1	0	0	0	0	1	1	0	0	1	0	0	3
144	287	Patient Satisfaction with Electroplated Telescopic Prostheses on Zirconia Primary Crowns 2015	0	0	0	1	0	1	1	0	0	1	0	0	0	0	0	1	0	0	0	1	1	1	1	0	1	0	0	4
145	289	Surgical Reconstruction of Peri-implant Osseous Defects: a Multicenter RCT 2015	1	1	0	1	0	1	1	0	0	1	0	0	0	0	1	0	0	0	0	0	1	1	0	1	1	0	0	7
146	291	Tooth Bleaching Effects on the Adhesive Interface of Composite Restorations 2015	0	0	0	0	0	1	1	0	0	1	0	0	0	0	1	0	0	0	0	0	0	1	0	0	1	0	0	4
147	293	Two-year Success, Clinical Performance and Patient Satisfaction of Fiber-reinforced-composite Fixed-partial-dentures 2015	0	0	0	1	0	1	1	0	0	1	0	0	0	0	0	1	0	1	0	0	1	1	0	0	1	0	0	4
Article
1	2	Do traditional techniques produce better conventional complete dentures than simplified techniques?	0	0	0	1	0	1	1	0	0	1	0	0	1	0	0	1	0	0	0	0	1	1	0	0	1	0	0	4
2	4	Does a prosthodontist spend more time providing mandibular two-implant overdentures than conventional dentures?	0	0	0	1	0	1	1	0	0	1	0	0	0	0	1	0	0	0	0	0	1	1	0	0	1	0	0	4
3	6	Efficiency of occlusal appliance therapy in secondary otalgia and temporomandibular disorders	0	0	0	1	0	1	1	0	0	1	0	0	0	1	0	1	0	0	0	0	1	1	0	0	1	0	0	3
4	8	A three-year clinical evaluation of two dentin bonding agents	0	0	0	0	0	1	1	0	0	1	0	0	0	0	0	1	0	0	0	0	1	1	0	0	1	0	0	3
5	10	Effect of mandibular ridge height on masticatory performance with mandibular conventional and implant-assisted overdentures ☆	0	0	0	0	0	1	1	0	0	0	0	0	0	0	1	0	0	0	0	0	1	0	0	0	1	0	0	4
6	12	Color measurements as quality criteria for clinical shade matching of porcelain crowns	0	0	0	1	0	1	1	0	0	1	0	0	0	0	0	1	0	0	0	1	1	1	1	0	1	0	0	4
7	14	Efficacy of Pulsed Radio Frequency Energy Therapy in Temporomandibular Joint Pain and Dysfunction	0	0	0	1	0	1	1	0	0	1	0	0	0	1	1	0	0	0	0	0	1	1	0	0	1	0	0	4
8	16	Momentary pain and coping in temporomandibular disorder pain: Exploring mechanisms of cognitive behavioral treatment for chronic pain	0	0	0	0	0	1	1	0	0	0	0	0	0	0	0	1	0	0	0	0	0	0	0	0	1	0	0	3
9	18	A comparison of hydroxyapatite (HA) -coated threaded, HA-coated cylindric, and titanium threaded endosseous dental implants.	0	0	0	1	0	1	1	0	0	1	0	0	0	0	0	0	0	0	0	0	1	0	0	0	1	0	0	3
10	20	Effects of a denture adhesive on masticatory functions for complete denture wearers--consideration for the condition of denture-bearing tissues--.	0	0	0	1	0	1	1	0	0	0	0	0	0	0	0	1	0	0	0	0	1	0	0	0	1	0	0	3
11	22	The use of an oral exercise device in the treatment of muscular TMD	0	0	1	1	1	1	1	0	0	1	0	0	0	0	1	0	0	0	0	0	1	0	0	0	1	0	0	5
12	24	Association between nocturnal bruxism and gastroesophageal reflux	0	1	1	1	1	1	1	0	0	1	0	0	0	1	1	0	0	0	0	1	1	1	1	0	1	0	0	7
13	26	The clinical performance of CAD/CAM-generated composite inlays.	0	0	0	1	0	1	1	0	0	0	0	0	0	0	1	0	0	0	0	0	1	0	0	0	1	0	0	4
14	28	Cost-effectiveness of mandibular two-implant overdentures and conventional dentures in the edentulous elderly	0	0	0	1	0	1	1	0	0	0	0	0	0	0	1	0	0	0	0	0	1	1	0	0	1	0	0	4
15	30	Effect of complete dentures on body balance during standing and walking in elderly people	0	0	0	1	0	1	1	0	0	0	0	0	0	0	1	0	0	0	0	0	1	0	0	0	1	0	0	4
16	32	Treatment outcome of appliance therapy in temporomandibular disorder patients with myofascial pain after 6 and 12 months.	0	1	0	1	0	1	1	0	0	1	0	0	0	0	0	1	0	1	1	0	1	0	0	0	1	0	0	5
17	34	Selected characteristics of a new polyvinyl siloxane impression material--a randomized clinical trial	1	0	1	1	1	1	1	0	0	1	0	0	0	0	1	0	0	0	0	1	1	1	1	0	1	0	0	7
18	36	Effects of TMJ anesthesia and jaw-stretch reflexes in humans	0	0	0	1	0	1	1	0	0	1	0	0	0	1	0	1	0	0	0	0	1	0	0	0	1	0	0	3
19	38	Speech with maxillary implant prostheses: ratings of articulation	0	1	0	1	0	1	1	0	0	0	0	0	0	0	0	0	0	0	0	0	1	0	0	0	1	0	0	4
20	40	Three-year clinical effectiveness of a two-step self-etch adhesive in cervical lesions	0	0	0	1	0	1	1	0	0	1	0	0	0	0	0	1	0	0	0	0	1	0	0	0	1	0	0	3
21	42	Five-year clinical evaluation of two adhesive systems in non-carious cervical lesions.	0	0	0	1	0	1	1	0	0	1	0	0	1	0	1	0	0	1	0	0	1	0	0	0	1	0	0	6
22	44	Intramuscular injection of granisetron into the masseter muscle increases the pressure pain threshold in healthy participants and patients with localized myalgia.	0	0	0	1	0	1	1	0	0	1	0	0	0	1	0	1	0	0	0	0	1	1	0	0	1	0	0	3
23	46	A 10-year randomized clinical trial on the influence of splinted and unsplinted oral implants retaining mandibular overdentures: peri-implant outcome.	1	0	0	1	0	1	1	0	0	1	0	0	0	0	0	1	0	1	0	0	1	0	0	0	1	0	0	5
24	48	Postoperative Sensitivity: A Comparison of Two Bonding Agents	0	0	0	1	0	1	1	0	0	1	0	0	0	1	0	1	0	0	0	0	1	0	0	0	1	0	0	3
25	50	An eight-year follow-up to a randomized clinical trial of aftercare and cost-analysis with three types of mandibular implant-retained overdentures.	1	0	0	1	0	1	1	0	0	1	0	0	0	0	0	1	0	0	0	0	1	1	0	0	1	0	0	4
26	52	Recurrence of Candida Albicans Colonization in Denture Stomatitis Patients Treated with Low Level Laser Therapy	0	0	0	1	0	1	1	0	0	1	0	0	0	0	0	1	0	0	0	0	1	0	0	0	1	0	0	3
27	54	Clinical trial investigating success rates for polyether and vinyl polysiloxane impressions made with full-arch and dual-arch plastic trays.	0	0	0	1	0	1	1	0	0	0	0	0	0	0	0	1	0	1	0	0	1	1	0	0	1	0	0	4
28	56	Efficient resource use in simplified complete denture fabrication.	0	0	0	1	0	1	1	0	0	1	0	0	0	0	0	1	0	0	0	0	1	0	0	0	1	0	0	3
29	58	The advantages of occupational therapy in oral hygiene measures for institutionalised elderly adults.	0	0	1	1	1	1	1	0	0	1	0	0	0	0	0	1	0	0	0	0	1	0	0	0	1	0	0	4
30	60	Time to survival for the restoration of the shortened lower dental arch	0	0	0	1	0	1	1	0	0	1	0	0	0	0	1	0	0	0	0	1	1	1	1	0	1	0	0	5
31	62	Two-year clinical performance of two one-step self-etching adhesives in the restoration of cervical lesions.	0	1	0	1	0	1	1	0	0	0	0	0	0	0	0	1	0	0	0	0	1	0	0	0	1	0	0	4
32	64	A Randomized Controlled Trial of Implant-retained Mandibular Overdentures	1	0	0	1	0	1	1	0	0	1	0	0	0	0	1	0	0	1	1	0	1	0	0	0	1	0	0	6
33	66	Patient ratings of chewing ability from a randomised crossover trial: lingualised vs. first premolar/canine-guided occlusion for complete dentures	1	1	0	1	0	1	1	0	0	1	0	0	0	0	1	0	0	0	0	0	1	0	0	0	1	0	0	6
34	68	Simplified versus comprehensive fabrication of complete dentures: patient ratings of denture satisfaction from a randomized crossover trial.	1	1	0	1	0	1	1	0	0	1	0	0	0	0	1	0	0	0	0	0	1	0	0	0	1	0	0	6
35	70	Reduction of sleep bruxism using a mandibular advancement device: an experimental controlled study.	0	1	0	1	0	1	1	0	0	1	0	0	0	0	0	1	0	0	0	0	1	0	0	0	1	0	0	4
36	72	Reduction in parafunctional activity: a potential mechanism for the effectiveness of splint therapy.	0	0	0	1	0	1	1	0	0	1	0	0	0	1	0	0	0	0	0	0	1	0	0	0	1	0	0	3
37	74	A randomized-controlled trial of food choices made by edentulous adults	1	0	0	1	0	1	1	0	0	1	0	0	0	0	1	0	0	1	1	0	1	0	0	0	1	0	0	6
38	76	Randomized control trial of composite cuspal restorations: five-year results.	1	0	0	1	0	1	1	0	0	1	0	0	0	0	1	0	0	0	0	0	1	1	0	0	1	1	0	6
39	78	A prospective clinical study of non-submerged immediate implants: clinical outcomes and esthetic results.	0	0	0	1	0	1	1	0	0	1	0	0	0	0	1	0	0	0	0	0	1	1	0	0	1	0	0	4
40	80	Clinical Performance of CAD/CAM-Generated Composite Inlays After 10 Years	0	0	0	0	0	1	1	0	0	0	0	0	0	0	0	0	0	0	0	0	0	0	0	0	1	0	0	3
41	82	Clinical evaluation of an all-in-one adhesive in non-carious cervical lesions with different degrees of dentin sclerosis	0	0	0	1	0	1	1	0	0	1	0	0	0	0	1	0	0	0	0	0	1	0	0	0	0	0	0	3
42	84	A randomized controlled clinical trial of edentulous patients treated with immediately loaded implant-supported mandibular fixed prostheses	1	1	1	1	1	1	1	0	0	1	0	0	0	1	0	1	0	1	0	0	1	0	0	0	1	0	0	7
43	86	Clinical study of the color stability of veneering ceramics for zirconia frameworks	0	0	0	1	0	1	1	0	0	1	0	0	1	0	0	1	0	0	0	0	1	1	0	0	1	0	0	4
44	88	Endogenous glutamate in association with inflammatory and hormonal factors modulates bone tissue resorption of the temporomandibular joint in patients with early rheumatoid arthritis.	0	0	0	1	0	1	1	0	0	0	0	0	0	0	0	1	0	0	0	0	1	0	0	0	1	0	0	3
45	90	Application of a dental adhesive using the self-etch and etch-and-rinse approaches: an 18-month clinical evaluation	0	0	0	1	0	1	1	0	0	1	0	0	0	0	0	1	0	1	0	0	1	0	0	0	1	0	0	4
46	92	Effect of awareness through movement on the head posture of bruxist children	0	0	0	1	0	1	1	0	0	1	0	0	0	1	1	0	0	0	0	0	0	0	0	0	1	0	0	4
47	94	Efficacy of low-level laser therapy in the treatment of temporomandibular disorder.	0	0	0	0	0	1	1	0	0	1	0	0	0	0	0	1	0	0	0	0	1	0	0	0	1	0	0	3
48	96	Immediate implant placement with transmucosal healing in areas of aesthetic priority: A multicentre randomized‐controlled clinical trial I. Surgical outcomes	1	0	0	0	0	1	1	0	0	1	0	0	0	0	0	1	0	0	0	0	1	0	0	0	1	0	0	4
49	98	A randomized controlled trial of superior and inferior temporomandibular joint space injection with hyaluronic acid in treatment of anterior disc displacement without reduction.	1	0	0	1	0	1	1	0	0	1	0	0	0	0	0	1	0	1	0	0	1	0	0	0	1	0	0	5
50	100	Randomized clinical trial of treatment for TMJ disc displacement.	1	0	0	1	0	1	1	0	0	1	0	0	0	0	0	1	0	0	0	0	1	0	0	0	1	0	0	4
51	102	Influence of matrix systems on proximal contact tightness of 2- and 3-surface posterior composite restorations in vivo.	0	0	0	1	0	1	1	0	0	1	0	0	0	0	0	1	0	0	0	0	1	1	0	0	1	0	0	3
52	104	Improving clinical retention of one-step self-etching adhesive systems with an additional hydrophobic adhesive layer	0	0	0	1	0	1	1	0	0	1	0	0	0	0	1	0	0	0	0	0	1	0	0	0	1	0	0	4
53	106	Efficient resource use in simplified complete denture fabrication.	0	0	0	0	0	1	1	0	0	1	0	0	0	0	0	1	0	0	0	0	1	0	0	0	1	0	0	3
54	108	Does mandibular edentulous bone height affect prosthetic treatment success? ☆	0	0	0	1	0	1	1	0	0	1	0	0	0	0	0	1	0	0	0	0	1	0	0	0	1	0	0	3
55	110	Effect of an adjustable mandibular advancement appliance on sleep bruxism: a crossover sleep laboratory study.	0	1	0	1	0	1	1	0	0	1	0	0	0	0	0	1	0	0	0	0	1	0	0	0	1	0	0	4
56	112	Comparison of denture microwave disinfection and conventional antifungal therapy in the treatment of denture stomatitis: a randomized clinical study	1	0	0	1	0	1	1	0	0	0	0	0	0	0	0	1	0	0	0	0	1	0	0	0	1	0	0	4
57	114	Glutamate-induced temporomandibular joint pain in healthy individuals is partially mediated by peripheral NMDA receptors.	0	0	0	0	0	1	1	0	0	1	0	0	0	1	0	1	0	0	0	0	1	0	0	0	1	0	0	3
58	116	A randomized controlled clinical trial of a HEMA-free all-in-one adhesive in non-carious cervical lesions at 1 year	1	0	0	1	0	1	1	0	0	1	0	0	0	0	0	1	0	0	0	0	1	0	0	0	1	0	0	4
59	118	Impact of facial form on the relationship between conventional or implant-assisted mandibular dentures and masticatory function.	0	0	0	1	0	1	1	0	0	1	0	0	0	0	0	0	0	0	0	0	1	0	0	0	1	0	0	3
60	120	A Randomized Clinical Trial Comparing Patient Satisfaction and Prosthetic Outcomes with Mandibular Overdentures Retained by One or Two Implants	1	0	0	1	0	1	1	0	0	1	0	0	0	0	0	1	0	1	0	0	1	0	0	0	1	0	0	5
61	122	Self-adhesive resin cement versus zinc phosphate luting material: A prospective clinical trial begun 2003	0	0	0	1	0	1	1	0	0	1	0	0	0	0	0	1	0	0	0	0	1	0	0	0	1	0	0	3
62	124	A prospective, randomized, controlled comparison of platform-switched and matched-abutment implants in short-span partial denture situations	1	0	0	0	0	1	1	0	0	1	0	0	0	0	0	1	0	0	0	0	1	0	0	0	1	0	0	4
63	126	A clinical study to evaluate denture adhesive use in well-fitting dentures.	0	1	0	1	0	1	1	0	0	1	0	0	0	0	0	1	0	0	0	0	1	0	0	0	1	0	0	4
64	128	Clinical Evaluation of a Self-Etching Adhesive After Two Years	0	0	0	1	0	1	1	0	0	1	0	0	0	0	0	1	0	1	0	0	1	0	0	0	1	0	0	4
65	130	Clinical performance of cervical restorations with desensitizing agents: 18-month clinical trial.	0	0	0	1	0	1	1	0	0	1	0	0	0	1	0	1	0	0	0	0	1	0	0	0	1	0	0	3
66	132	Color stability of chemically activated reline resin after microwave disinfection: a 1-year clinical trial.	0	0	0	1	0	1	1	0	0	1	0	0	0	0	1	0	0	0	0	0	1	0	0	0	0	0	0	3
67	134	Evaluation of packable and conventional hybrid resin composites in Class I restorations: three-year results of a randomized, double-blind and controlled clinical trial	1	1	0	1	0	1	1	0	0	1	1	0	0	1	0	1	0	0	0	0	1	0	0	0	1	0	0	5
68	136	Three years in vivo wear: core-ceramic, veneers, and enamel antagonists	0	0	0	1	0	1	1	0	0	1	0	0	0	0	0	1	0	0	0	0	1	0	0	0	0	0	0	2
69	138	The effect of subgingival ozone and/or hydrogen peroxide on the development of peri-implant mucositis: a double-blind randomized controlled trial	1	0	0	1	0	1	1	0	0	1	0	0	0	1	0	1	0	0	0	0	1	0	0	0	1	0	0	4
70	140	Effects of metallic or translucent matrices for class II composite restorations: 4-year clinical follow-up findings	0	1	0	1	0	1	1	0	0	1	0	0	0	0	0	1	0	1	0	0	1	0	0	0	1	0	0	5
71	142	The randomized shortened dental arch study: oral health-related quality of life	1	0	0	1	0	1	1	0	0	1	0	0	0	0	1	0	0	0	0	0	1	0	0	0	1	0	0	5
72	144	Three-year clinical evaluation of a flowable and a hybrid resin composite in non-carious cervical lesions.	0	0	1	1	1	1	1	0	0	1	0	0	1	0	1	0	0	0	0	0	1	0	0	0	1	0	0	6
73	146	3-year clinical effectiveness of one-step adhesives in non-carious cervical lesions.	0	0	0	1	0	1	1	0	0	1	0	0	0	0	0	1	0	1	0	0	1	0	0	0	1	0	0	4
74	148	Comparison of Photodynamic Therapy versus conventional antifungal therapy for the treatment of denture stomatitis: a randomized clinical trial	1	0	0	1	0	1	1	0	0	1	0	0	0	0	1	0	0	0	0	0	1	0	0	0	1	0	0	5
75	150	Effect of electromyogram biofeedback on daytime clenching behavior in subjects with masticatory muscle pain.	0	0	0	1	0	1	1	0	0	1	0	0	0	0	0	1	0	0	0	0	1	0	0	0	1	0	0	3
76	152	Effectiveness of a prefabricated occlusal appliance in patients with temporomandibular joint pain: a randomized controlled multicenter study.	1	0	0	1	0	1	1	0	0	1	0	0	0	0	1	0	0	0	0	0	1	0	0	1	1	0	0	6
77	154	In vivo efficacy of alkaline peroxide tablets and mouthwashes on Candida albicans in patients with denture stomatitis.	0	0	0	1	0	1	1	0	0	1	0	0	0	0	0	1	0	0	0	0	1	0	0	0	1	0	0	3
78	156	Efficacy of stabilisation splint treatment on temporomandibular disorders.	0	0	0	1	0	1	1	0	0	1	0	0	0	0	1	0	0	0	0	0	1	0	0	0	1	0	0	4
79	158	Eight-year clinical evaluation of a 2-step self-etch adhesive with and without selective enamel etching	0	0	0	1	0	1	1	0	0	1	0	0	0	0	0	1	0	1	0	0	1	0	0	0	1	0	0	4
80	160	Five-year follow-up of implant-supported Y-TZP and ZTA fixed dental prostheses. A randomized, prospective clinical trial comparing two different material systems	1	0	0	1	0	1	1	0	0	0	0	0	0	0	1	0	0	1	0	0	1	0	0	0	1	0	0	6
81	162	Laser acupuncture in patients with temporomandibular dysfunction: a randomized controlled trial.	1	0	0	1	0	1	1	0	0	1	0	0	0	1	0	1	0	0	0	0	1	0	0	1	1	0	0	5
82	164	Influence of mandibular residual ridge resorption on objective masticatory measures of lingualized and fully bilateral balanced denture articulation	0	0	0	1	0	1	1	0	0	1	0	0	0	0	0	1	0	0	0	0	1	0	0	0	1	1	0	4
83	166	Long-term efficacy of resilient appliance therapy in TMD pain patients: a randomised, controlled trial.	1	0	0	1	0	1	1	1	0	1	0	0	0	0	0	1	0	0	1	0	1	0	0	0	1	0	0	5
84	168	Is oral health-related quality of life stable following rehabilitation with mandibular two-implant overdentures?	0	0	0	0	0	1	1	0	0	1	0	0	0	0	0	1	0	0	0	0	1	0	0	0	1	0	0	3
85	170	Non-surgical treatment of peri-implantitis using an air-abrasive device or mechanical debridement and local application of chlorhexidine: a prospective, randomized, controlled clinical study.	1	1	0	1	0	1	1	0	0	1	0	0	0	0	0	1	0	0	0	0	1	0	0	0	1	0	0	5
86	172	Effect of experimental jaw muscle pain on occlusal contacts	0	1	0	1	0	1	1	0	0	1	0	0	0	0	1	0	0	0	0	0	1	0	0	0	1	0	0	5
87	174	A randomized controlled clinical trial comparing the effects of three loading protocols on dental implant stability	1	0	0	0	0	1	1	0	0	1	0	0	0	0	0	1	0	1	0	0	1	0	0	0	1	0	0	5
88	176	The randomized shortened dental arch study: 5-year maintenance	1	0	0	0	0	1	1	0	0	1	0	0	0	0	0	1	0	0	0	0	1	0	0	0	1	1	0	5
89	178	24 Months Evaluation Of Class V Restorations With Different Composites	0	0	0	1	0	1	1	0	0	1	0	0	0	0	0	1	0	0	0	0	1	0	0	1	1	0	0	4
90	180	Efficacy of botulinum toxin type A for treatment of persistent myofascial TMD pain: A randomized, controlled, double-blind multicenter study	1	1	0	1	0	1	1	1	0	1	0	0	0	0	0	1	0	0	0	0	1	0	0	0	1	0	0	6
91	182	Trial of an experimental castor oil solution for cleaning dentures	0	1	0	1	0	1	1	0	0	1	1	0	0	0	1	0	0	0	0	0	1	0	0	0	1	0	0	5
92	184	A new universal simplified adhesive: 36-Month randomized double-blind clinical trial.	1	0	0	0	0	1	1	0	0	0	0	0	0	0	0	1	0	1	0	0	1	0	0	0	1	0	0	5
93	186	Clinical Performance of CAD/CAM-Generated Composite Inlays After 10 Years.	0	0	0	0	0	1	1	0	0	0	0	0	0	0	0	0	0	0	0	0	0	0	0	0	1	0	0	3
94	188	A randomized double-blind clinical trial of posterior compositerestorations with or without bevel: 1-year follow-up	1	0	0	1	0	1	1	0	0	1	0	0	0	1	1	0	0	0	0	0	1	0	0	0	1	0	0	5
95	190	Colour stability of relined dentures after chemical disinfection. A randomised clinical trial.	1	0	0	0	0	1	1	0	0	1	0	0	0	0	1	0	0	0	0	0	1	0	0	0	1	0	0	5
96	192	Clinical effectiveness of a hydrophobic coating used in conjunction with a one-step self-etch adhesive: an 18-month evaluation	0	0	0	1	0	1	1	0	0	1	0	0	0	0	1	0	0	1	0	0	1	0	0	0	1	0	0	5
97	194	Cost‐effectiveness of tooth replacement strategies for partially dentate elderly: a randomized controlled clinical trial	1	0	0	1	0	1	1	0	0	1	0	0	0	0	0	1	0	0	0	0	1	1	0	0	1	0	0	4
98	196	Microwave denture disinfection versus nystatin in treating patients with well-controlled type 2 diabetes and denture stomatitis: a randomized clinical trial.	1	0	0	1	0	1	1	0	0	1	0	0	0	0	0	1	0	0	0	0	1	0	0	0	1	0	0	4
99	198	Comparison of two early loading protocols in full arch reconstructions in the edentulous maxilla using the Cresco prosthetic system: a three-arm parallel group randomized-controlled trial	1	1	0	1	0	1	1	0	0	1	0	0	0	1	0	1	0	1	0	0	1	0	0	0	1	0	0	6
100	200	Influence of Platform Switching on Bone-level Alterations	0	0	0	1	0	1	1	0	0	1	0	0	0	0	0	1	0	0	0	1	1	1	1	0	1	1	0	5
101	202	36-month clinical performance evaluation of a current glass-ionomer restorative system（改过原文）	0	0	0	0	0	1	1	0	0	1	0	0	0	0	1	0	0	1	0	0	1	1	0	0	1	0	0	5
102	204	A new universal simplified adhesive: 18-month clinical evaluation	0	0	0	0	0	1	1	0	0	0	0	0	0	0	0	1	0	1	0	0	1	0	0	0	1	0	0	4
103	206	Alkaline Peroxides Versus Sodium Hypochlorite for Removing Denture Biofilm: a Crossover Randomized Trial.	1	1	0	1	0	1	1	0	0	1	0	0	0	0	1	0	0	0	0	0	1	0	0	0	1	0	0	6
104	208	Piroxicam and laser phototherapy in the treatment of TMJ arthralgia: a double-blind randomised controlled trial	1	0	0	1	0	1	1	0	0	1	0	0	0	1	0	1	0	0	0	0	0	1	0	0	1	0	0	4
105	210	Randomized multi-centre study on the effect of training on tooth shade matching.	1	0	1	1	1	1	1	0	0	1	0	0	0	1	1	0	0	0	0	0	1	0	0	0	1	0	0	6
106	212	Effectiveness of chemical disinfection on biofilms of relined dentures: A randomized clinical trial	1	0	0	0	0	1	1	0	0	1	0	0	0	0	1	0	0	0	0	0	1	0	0	0	0	0	0	4
107	214	Effect of EDTA conditioning on cervical restorations bonded with a self-etch adhesive: A randomized double-blind clinical trial.	1	0	0	1	0	1	1	0	0	1	0	0	1	0	1	0	0	0	0	1	1	1	1	0	1	0	0	7
108	216	A double-blind randomized clinical trial of a silorane-based resin composite in class 2 restorations: 18-month follow-up（改过原文）	0	0	0	0	0	1	1	0	0	1	0	0	0	1	1	0	0	1	0	0	1	1	0	0	1	0	0	5
109	218	Effect of Implant Angulation on Attachment Retention in Mandibular Two‐Implant Overdentures: A Clinical Study	0	1	0	1	0	1	1	0	0	1	0	0	0	0	0	1	0	0	0	0	1	1	0	0	1	0	0	4
110	220	Early, delayed, or late single implant placement: 10-year results from a randomized controlled clinical trial.	1	0	0	0	0	1	1	0	0	1	0	0	0	0	0	1	0	0	0	0	1	0	0	0	1	0	0	4
111	222	Effect of systemic antibiotics on clinical and patient-reported outcomes of implant therapy – a multicenter randomized controlled clinical trial	1	0	0	1	0	1	1	0	0	1	0	0	1	0	0	1	0	0	0	0	0	1	0	0	1	0	0	5
112	224	Influence of platform switching on bone-level alterations: a three-year randomized clinical trial.	1	0	0	0	0	1	1	0	0	1	0	0	0	0	0	1	0	0	0	1	1	1	1	0	1	1	0	6
113	226	Do implant overdentures improve dietary intake? A randomized clinical trial.	1	0	0	1	0	1	1	0	0	1	0	0	0	0	1	0	0	0	0	0	0	1	0	0	1	0	0	5
114	228	Masticatory efficiency in complete denture wearers with reduced dental arches--a randomised cross-over study.	1	0	0	0	0	1	1	0	0	1	0	0	0	0	0	1	0	0	0	0	1	0	0	0	1	0	0	4
115	230	Profilaxis versus tratamiento antimicrobiano en pacientes sometidos a implantes orales Antibiotic prophylaxis versus antimicrobial therapy in patients undergoing dental implants	0	0	0	1	0	1	1	0	0	1	0	0	0	0	1	0	0	0	0	0	1	1	0	0	1	0	0	4
116	232	Management of painful temporomandibular joint clicking with different intraoral devices and counseling: a controlled study	0	0	0	1	0	1	1	0	0	1	0	0	0	0	1	0	0	0	0	0	1	0	0	0	1	0	0	4
117	234	A Randomized Trial on Simplified and Conventional Methods for Complete Denture Fabrication: Cost Analysis	1	0	0	1	0	1	1	0	0	1	0	0	0	0	1	0	0	0	0	0	1	1	0	0	1	0	0	5
118	236	Overnight storage of removable dentures in alkaline peroxide-based tablets affects biofilm mass and composition	1	1	0	0	0	1	1	0	0	1	0	0	0	0	0	1	0	0	0	0	1	1	0	0	1	0	0	5
119	238	Eighteen-month randomized clinical trial on the performance of two etch-and-rinse adhesives in non-carious cervical lesions	0	0	0	1	0	1	1	0	0	1	0	0	0	0	0	1	0	1	0	1	1	1	1	0	0	0	0	4
120	240	Comparison of two different composite resins used for tooth reshaping and diastema closure in a 4-year follow-up	0	0	0	1	0	1	1	0	0	1	0	0	0	0	1	0	0	1	0	0	1	1	0	0	1	0	0	5
121	242	Anti‐infective therapy of peri‐implantitis with adjunctive local drug delivery or photodynamic therapy: 12‐month outcomes of a randomized controlled clinical trial	1	0	0	1	0	1	1	1	0	1	0	0	0	0	1	0	0	0	0	0	1	1	0	0	1	0	0	6
122	244	Bacterial adhesion on the titanium and zirconia abutment surfaces	0	1	0	0	0	1	1	0	0	1	0	0	0	0	0	1	0	0	0	0	0	1	0	0	1	0	0	4
123	246	Crossover clinical trial of the influence of the use of adhesive on biofilm formation.	0	1	0	1	0	1	1	0	0	1	0	0	0	0	1	0	0	0	0	0	0	1	0	0	1	0	0	5
124	248	Denture adhesives improve mastication in denture wearers	0	0	0	1	0	1	1	0	0	1	0	0	0	0	0	1	0	0	0	0	0	1	0	0	1	0	0	3
125	250	Effect of a denture adhesive on the satisfaction and kinesiographic parameters of complete denture wearers: a cross-over randomized clinical trial.	1	1	0	1	0	1	1	0	0	1	1	0	0	0	1	0	0	0	0	0	1	1	0	0	1	0	0	6
126	252	Management of shortened dental arches and periodontal health: 5-year results of a randomised trial.	1	0	0	1	0	1	1	0	0	0	0	0	0	0	1	0	0	0	0	1	1	1	1	0	1	1	0	7
127	254	A randomised trial on simplified and conventional methods for complete denture fabrication: masticatory performance and ability	1	0	0	1	0	1	1	0	0	1	0	0	0	0	1	0	0	1	0	0	1	1	0	0	1	0	0	6
128	256	Four-year Randomized Clinical Trial to Evaluate the Clinical Performance of a Glass Ionomer Restorative System.	1	0	0	0	0	1	1	0	0	1	0	0	0	0	0	1	0	1	0	0	1	1	0	0	1	0	0	5
129	258	Effect of sodium hypochlorite and Ricinus communis solutions on control of denture biofilm: A randomized crossover clinical trial	1	1	0	0	0	1	1	0	0	1	0	0	0	0	0	1	0	0	0	0	1	0	0	0	1	0	0	5
130	260	A Randomised Controlled Trial of complete denture impression materials	1	1	1	1	1	1	1	1	0	1	0	0	0	1	1	0	0	1	0	1	1	1	1	0	1	1	0	11
131	262	Efficacy of stabilisation splint treatment on facial pain - 1-year follow-up.	0	0	0	0	0	1	1	0	0	1	0	0	0	0	1	0	0	0	0	0	1	0	0	0	1	0	0	4
132	264	A novel non-surgical method for mild peri-implantitis- a multicenter consecutive case series:	0	0	0	1	0	1	1	0	0	0	0	0	0	0	0	1	0	0	0	0	1	1	0	0	1	0	0	3
133	266	Clinical trial for evaluation of Ricinus communis and sodium hypochlorite as denture cleanser	0	1	0	1	0	1	1	0	0	1	0	0	0	1	1	0	0	0	0	0	1	1	0	0	1	0	0	5
134	268	3-year Randomized Controlled Prospective Clinical Trial on Different CAD-CAM Implant Abutments	1	0	0	0	0	1	1	0	0	1	0	0	0	0	0	1	0	0	0	0	1	1	0	0	1	0	0	4
135	270	A fractographic study of clinically retrieved zirconia-ceramic and metal-ceramic fixed dental prostheses	0	0	0	0	0	1	1	0	0	0	0	0	0	0	1	0	0	0	0	0	1	0	0	0	1	0	0	4
136	272	Influence of Abutment Color and Mucosal Thickness on Soft Tissue Color	0	0	0	0	0	1	1	0	0	1	0	0	0	0	0	1	0	1	0	0	1	1	0	0	1	0	0	4
137	274	Two-year Randomized, Controlled Clinical Trial of a Flowable and Conventional Composite in Class I Restorations	1	0	0	0	0	1	1	0	0	1	0	0	0	1	1	0	0	0	0	0	1	1	0	0	1	0	0	5
138	276	Short-term clinical performance of zirconia single crowns with different framework designs: 3-year clinical trial	0	0	0	0	0	1	1	0	0	1	0	0	0	0	0	1	0	0	0	0	1	1	0	0	0	0	0	2
139	278	Crown vs. composite for post-retained restorations: A randomized clinical trial ☆	1	0	0	1	0	1	1	0	0	1	0	0	0	0	0	1	0	1	0	0	1	1	0	0	1	1	0	6
140	280	Effect of different prosthetic abutments on peri-implant soft tissue. A randomized controlled clinical trial	1	0	0	0	0	0	1	0	0	0	0	0	0	0	0	1	0	0	0	0	1	1	0	0	1	0	0	3
141	282	Immediate implant placement and provisionalization in the aesthetic zone using a flapless or a flap‐involving approach: a randomized controlled trial	1	0	0	1	0	1	1	0	0	1	0	0	0	0	0	1	0	0	0	0	1	1	0	0	1	0	0	4
142	284	High-Definition and Non-Invasive Brain Modulation of Pain and Motor Dysfunction in Chronic TMD	0	0	0	1	0	1	1	0	0	1	0	0	0	0	0	1	0	0	0	0	0	1	0	0	1	0	0	3
143	286	A Randomized Clinical Trial of Oral Health-Related Quality of Life, Peri-Implant and Kinesiograph Parameters in Wearers of One-or Two-Implant Mandibular Overdentures.	1	0	0	0	0	1	1	0	0	1	0	0	0	0	1	0	0	0	0	0	1	1	0	0	1	0	0	5
144	288	Randomized trial investigating zirconia electroplated telescopic retainers: quality of life outcomes	1	0	0	1	0	1	1	0	0	1	0	0	0	0	0	1	0	0	0	1	1	1	1	0	1	0	0	5
145	290	Reconstruction of Peri-implant Osseous Defects: A Multicenter Randomized Trial	1	1	0	1	0	1	1	0	0	1	0	0	1	0	1	0	0	0	0	0	1	1	0	0	1	1	0	8
146	292	Tooth bleaching effects on the adhesive interface of composite restorations	0	0	0	0	0	1	1	0	0	1	0	0	0	0	1	0	0	0	0	0	0	1	0	0	1	0	0	4
147	294	Success, clinical performance and patient satisfaction of direct fibre-reinforced composite fixed partial dentures – a two-year clinical study	0	0	0	1	0	1	1	0	0	1	0	0	0	0	0	1	0	1	0	0	1	1	0	0	1	0	0	4
